# Supplementary material
Source: PubMed Central journal article supplement (PMC8792332)

Supplemental Figure 1. Comparison of Antibody Responses in ACAM2000 vs Dryvax Participants.

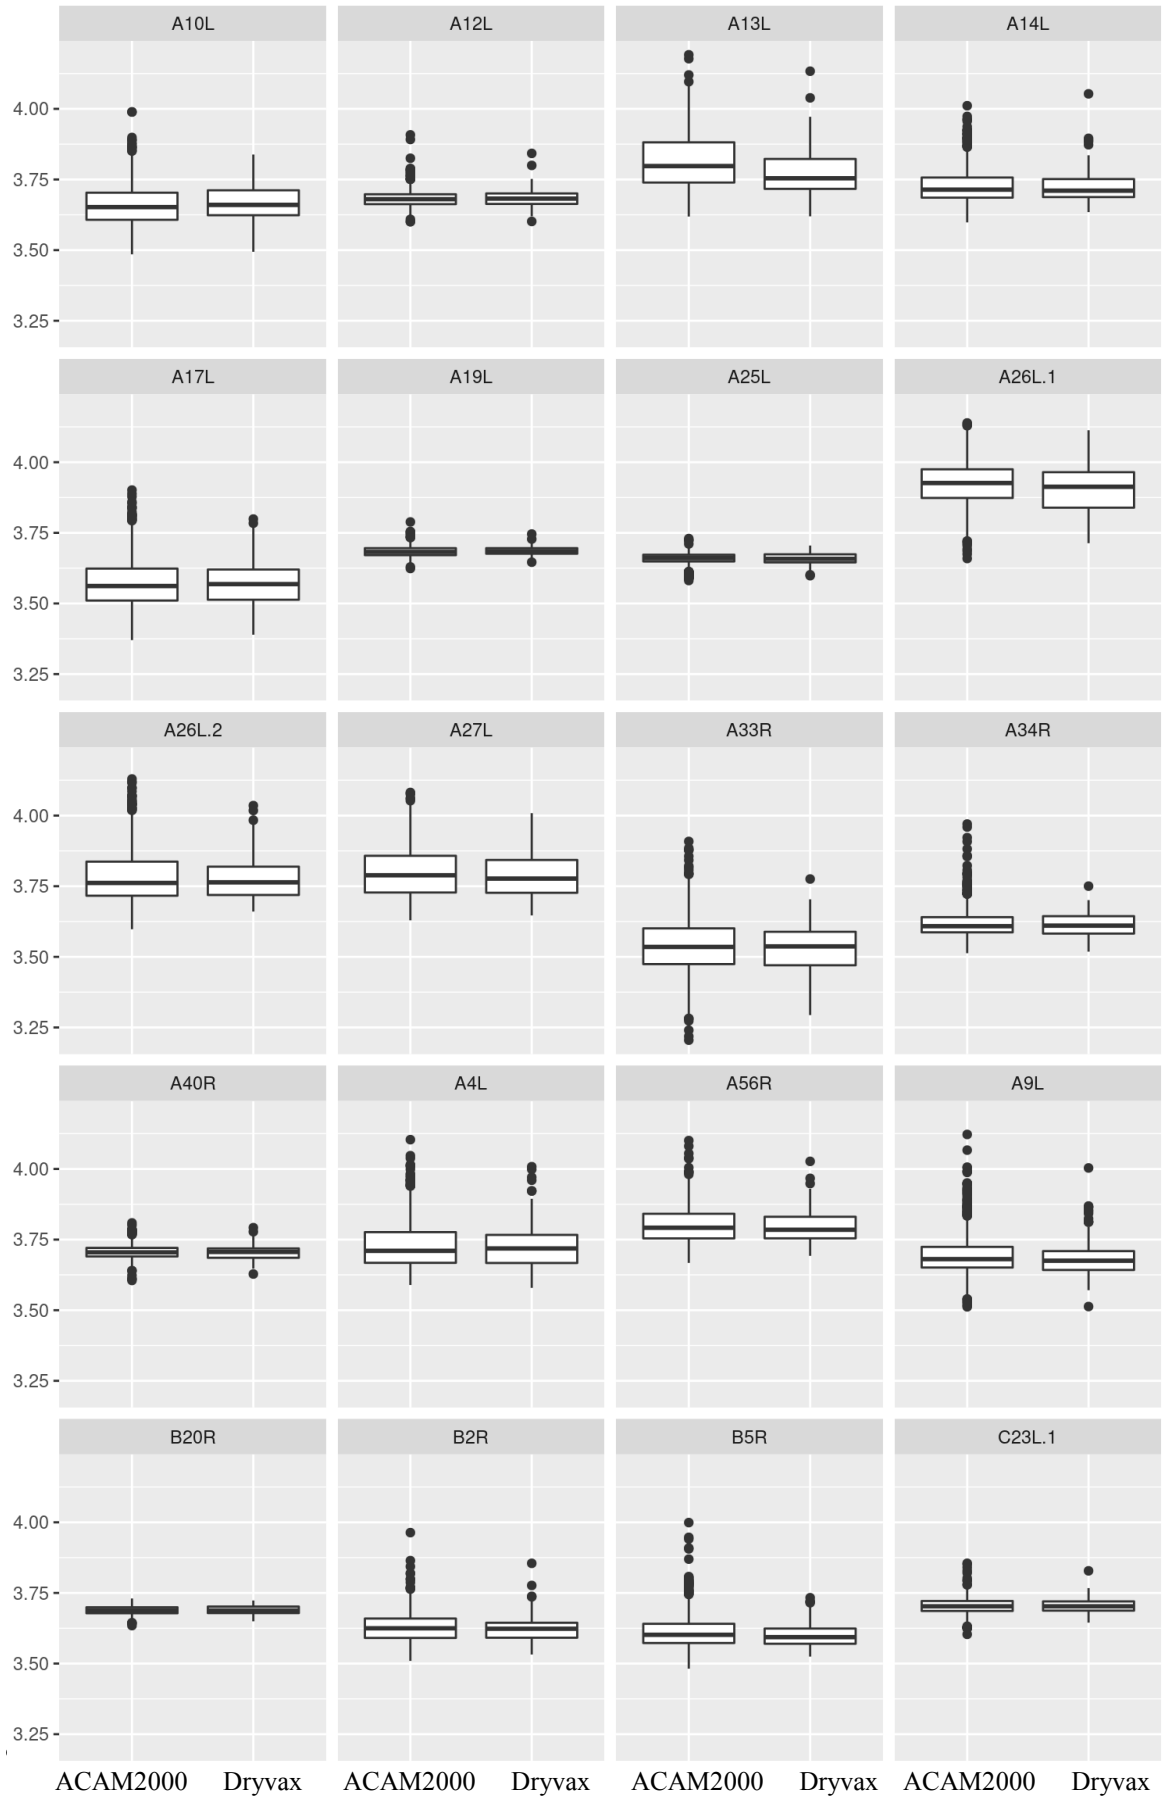

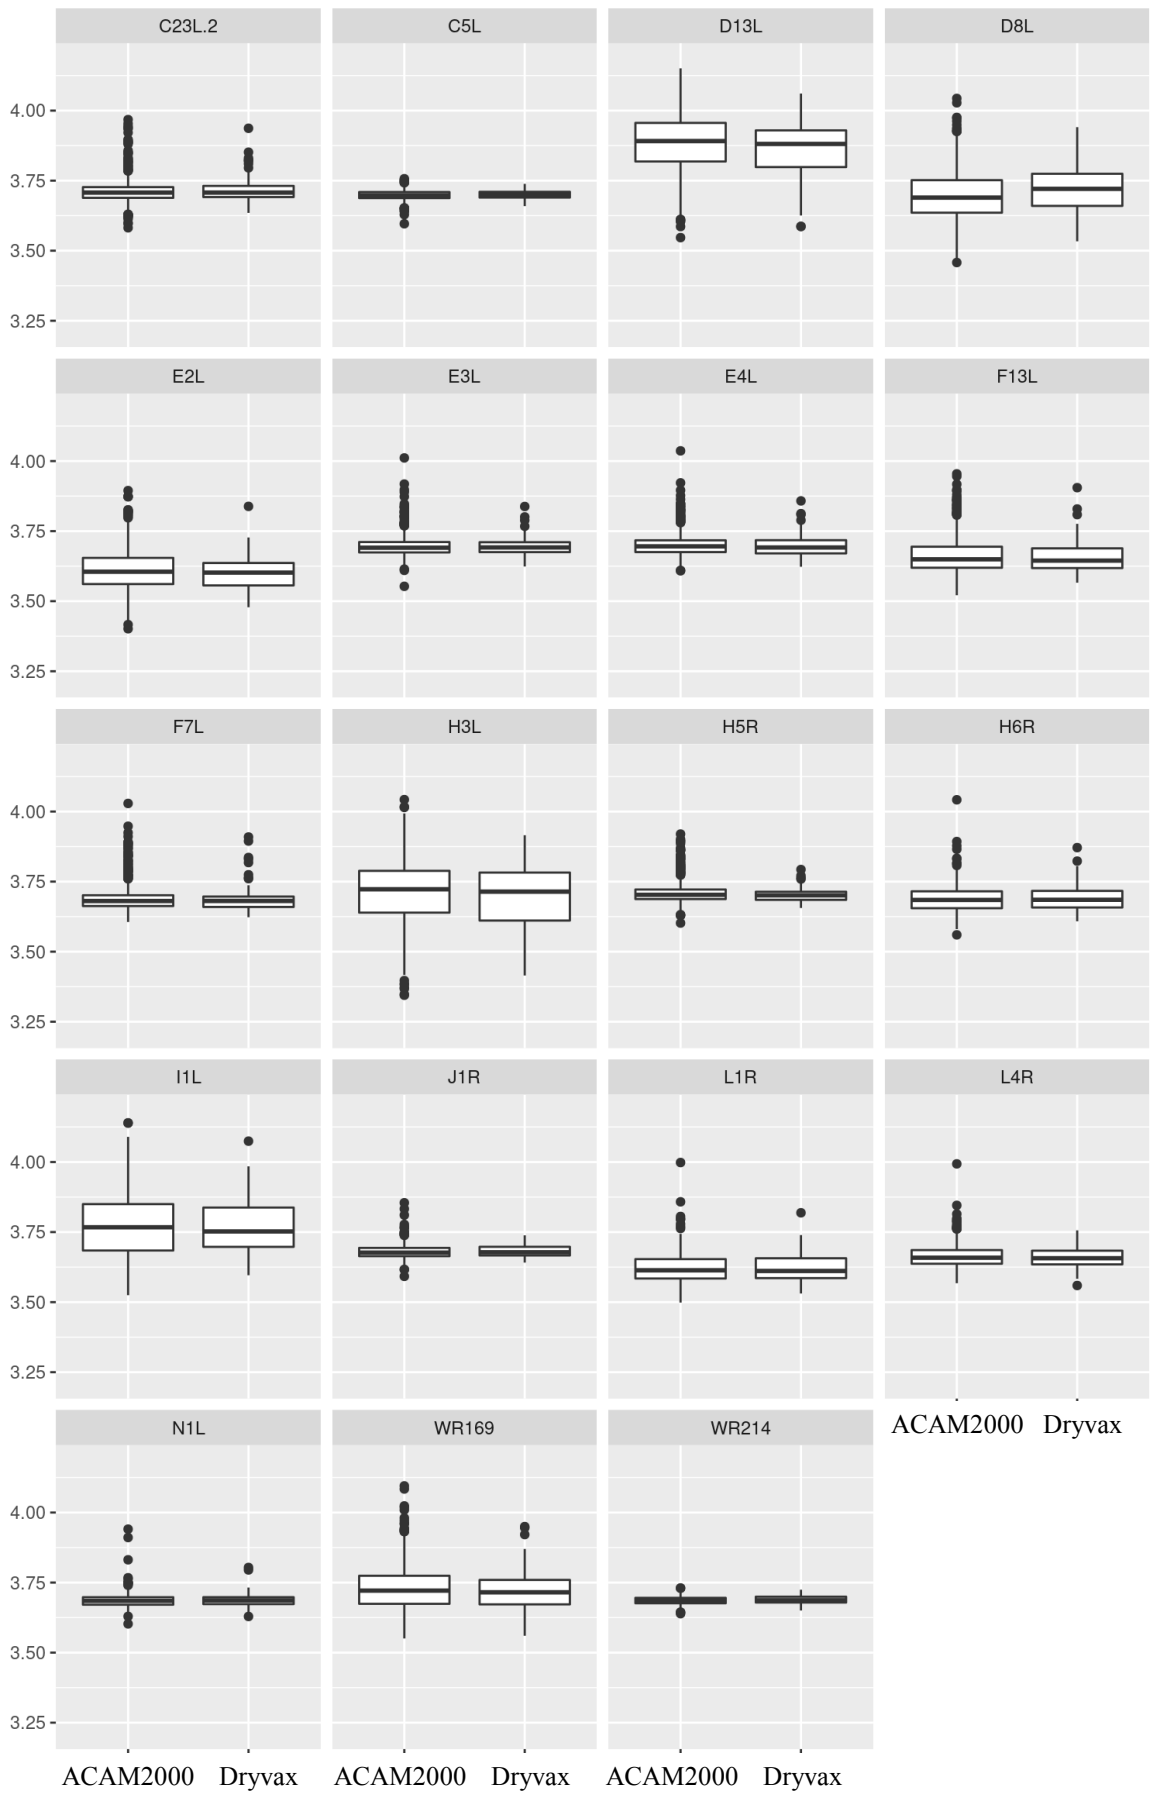

Supplement: NIHMS1766482-supplement-1.pdf [file NIHMS1766482-supplement-1.pdf]
